# Supplementary material
Source: publisher site journal article supplement (https://www.spandidos-publications.com/4695/downloadSupplementary)

Figure S1. VEGFA can regulate cell proliferation, apoptosis, invasion and PI3K/AKT signaling in HemECs. (A) Comparison of VEGFA mRNA expression among the groups after VEGFA overexpression. (B) Detection of VEGFA protein expression by western blotting after VEGFA overexpression, (C) which was semi-quantified. (D) Cell proliferation and (E) apoptosis rates among the groups after VEGFA overexpression. (F) Representative images of TUNEL staining in E (magnification, x200). (G) Comparison of invaded cells among the groups after VEGFA overexpression. (H) Representative images of invasive cells after crystal violet staining (magnification, x200). (I) Detection of PI3K and AKT phosphorylation by western blotting after VEGFA overexpression. Comparison of (J) p-PI3K/PI3K and (K) p-AKT/AKT ratios, \* $P < 0.05$ , \*\* $P < 0.01$  and \*\*\* $P < 0.001$ . NC, negative control; OD, optical density; p-, phosphorylated; VEGF, vascular endothelial growth factor; NS, not significant.

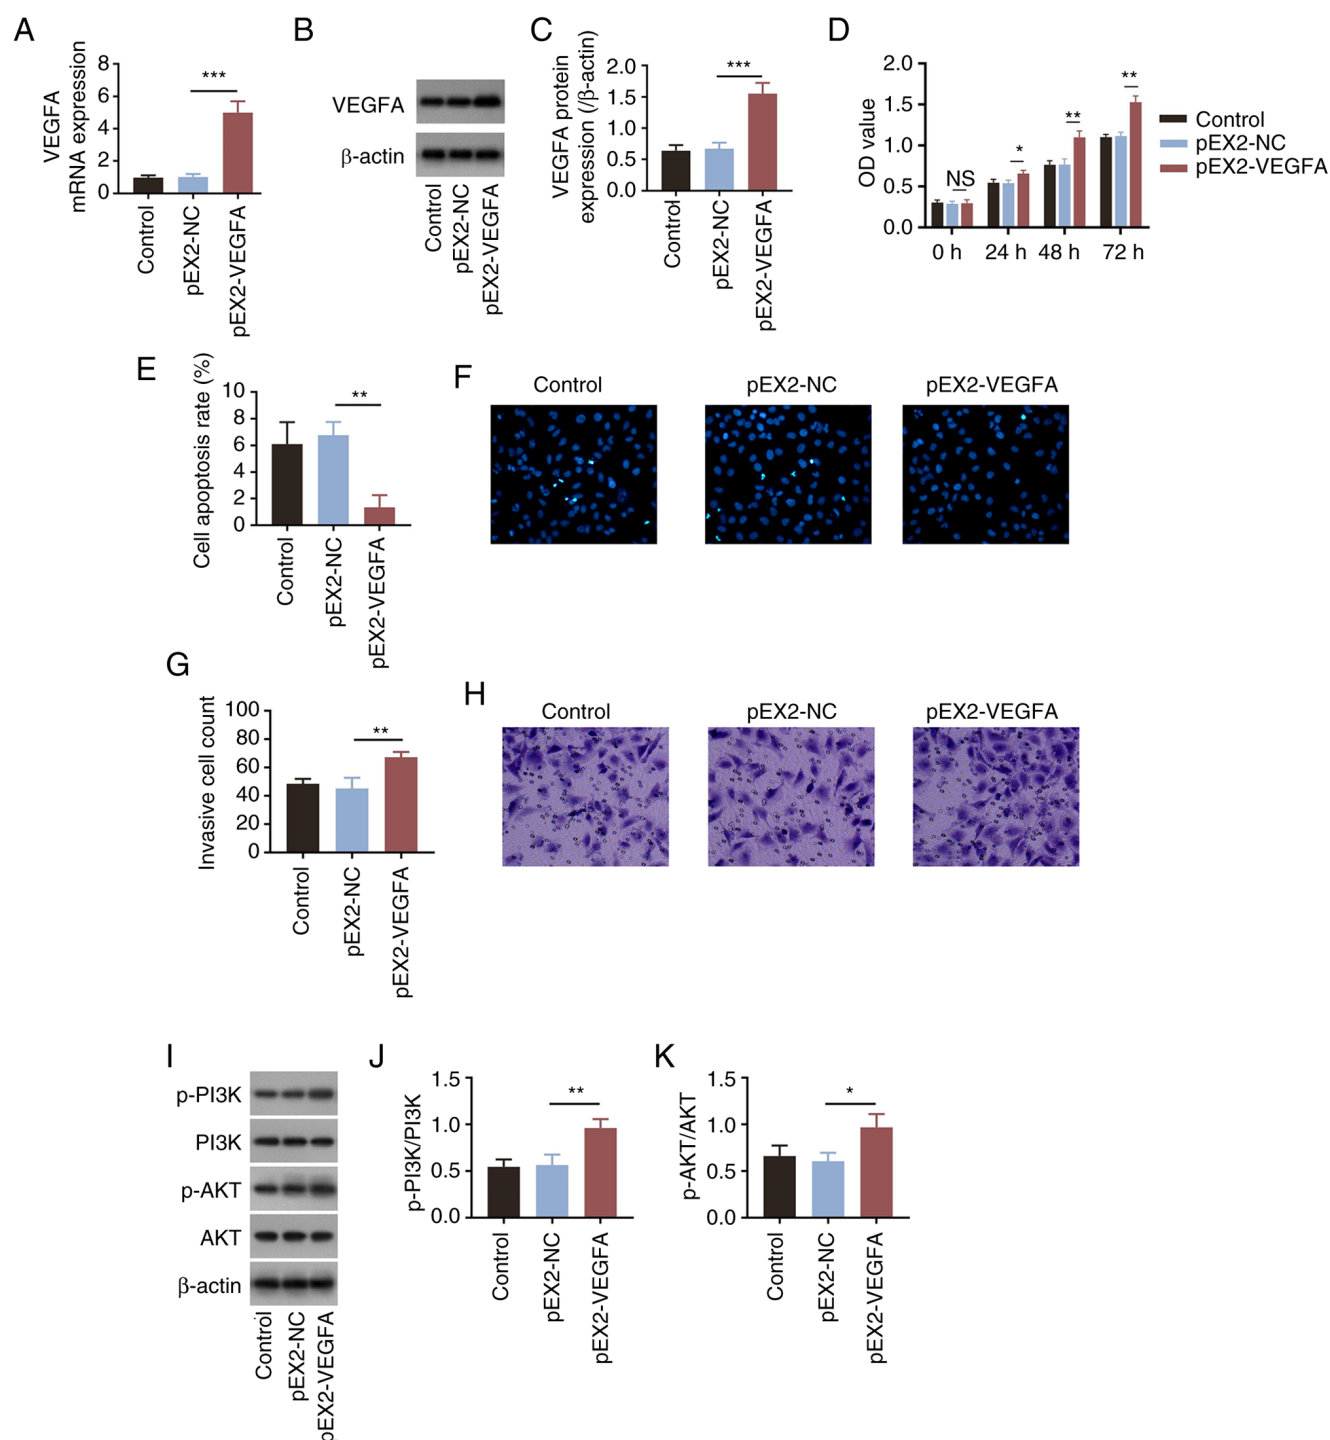

Supplement: Supplementary file 1 [file downloadSupplementary]
